# Supplementary material for: Evaluation of Clinical and Genetic Determinants of Treatment OutCome In EGFR Mutation Positive Advanced Lung Adenocarcinoma
Source: PubMed Central journal article supplement — Dose Response. 2022 Aug 4;20(3):15593258221117354. doi: 10.1177/15593258221117354 (PMC9358214; doi:10.1177/15593258221117354), 2022-08-04
Supplement: sj-pdf-1-dos-10.1177_15593258221117354.pdf [file sj-pdf-1-dos-10.1177_15593258221117354.pdf]

**Supplementary Table 1. Dosage regimens of analgesics**

| <b>Analgesic type</b>                  | <b>Drug name</b>     | <b>Typical starting dose [4, 5]</b>        | <b>Maximum dose used in this study</b> |
|----------------------------------------|----------------------|--------------------------------------------|----------------------------------------|
| <b>Acetaminophen</b>                   | <b>Paracetamol</b>   | 1 g q.d.s. PO                              | 4 g daily PO                           |
| <b>Non-steroidal anti-inflammatory</b> | <b>Ibuprofen</b>     | 400 mg t.d.s. PO                           | 1.2 g daily PO                         |
| <b>Weak opioid</b>                     | <b>Tramadol</b>      | 100 mg b.d. PO                             | 200 mg daily PO                        |
| <b>Strong opioid</b>                   | <b>Morphine</b>      | 5 mg q.d.s. for opioide naïve patients, PO | 60 mg daily PO                         |
|                                        | <b>Oxycodone</b>     | 5 mg every 4-6 hours PO                    | 20 mg daily PO                         |
|                                        | <b>Hydromorphone</b> | 8 mg o.d. PO                               | 16 mg daily PO                         |
|                                        | <b>Fentanyl</b>      | 25 mcg/h transdermal, reapplied q72hr      | 150 mcg/h                              |
|                                        | <b>Methadone</b>     | 2.5 mg o.d. PO                             | 5 mg daily PO                          |
| <b>Adjuvant analgesics</b>             | <b>Pregabalin</b>    | 75 mg b.d. PO                              | 300 mg daily PO                        |
|                                        | <b>Gabapentin</b>    | 300 mg o.d. PO                             | 900 mg daily PO                        |
|                                        | <b>Dexamethasone</b> | 4 mg b.d. PO                               | 8 mg daily PO                          |

o.d. - once per day, b.d. – twice per day, t.d.s. – three times per day, q.d.s. - four times per day, PO - per os.



**Supplementary Table 2. Pharmacological management of lung cancer-related pain in the patient cohort**

| <b>Analgesic type</b>                  | <b>Drug name</b>   | <b>Number of patients taking the drug (% of all patients on pain medication)</b> | <b>Dosage (TDD)*</b> | <b>Number of patients (% of patients on that drug)</b> |
|----------------------------------------|--------------------|----------------------------------------------------------------------------------|----------------------|--------------------------------------------------------|
| <b>Acetaminophen</b>                   | <b>Paracetamol</b> | 19 (46.3)                                                                        | 1000 mg              | 10 (52.6)                                              |
|                                        |                    |                                                                                  | 2000 mg              | 8 (42.1)                                               |
|                                        |                    |                                                                                  | 4000 mg              | 1 (5.3)                                                |
| <b>Non-steroidal anti-inflammatory</b> | <b>Ibuprofen</b>   | 11 (26.8)                                                                        | 400 mg               | 4 (36.4)                                               |
|                                        |                    |                                                                                  | 800 mg               | 6 (54.5)                                               |
|                                        |                    |                                                                                  | 1200 mg              | 1 (9.1)                                                |
| <b>Weak opioid</b>                     | <b>Tramadole</b>   | 10 (24.4)                                                                        | 50 mg                | 3 (30.0)                                               |
|                                        |                    |                                                                                  | 100 mg               | 3 (30.0)                                               |
|                                        |                    |                                                                                  | 200 mg               | 4 (40.0)                                               |
| <b>Strong opioid</b>                   | <b>Morphine</b>    | 31 (75.6)                                                                        | 20 mg                | 16 (51.6)                                              |
|                                        |                    |                                                                                  | 30 mg                | 7 (22.6)                                               |
|                                        |                    |                                                                                  | 40 mg                | 3 (9.7)                                                |
|                                        |                    |                                                                                  | 60 mg                | 5 (16.1)                                               |

|                                |                      |           |           |           |
|--------------------------------|----------------------|-----------|-----------|-----------|
|                                | <b>Oxycodone</b>     | 2 (4.9)   | 5 mg      | 1 (50.0)  |
|                                |                      |           | 20 mg     | 1 (50.0)  |
|                                | <b>Hydromorphone</b> | 8 (19.5)  | 8 mg      | 7 (87.5)  |
|                                |                      |           | 16 mg     | 1 (12.5)  |
|                                | <b>Fentanyl</b>      | 17 (41.5) | 25 mcg/h  | 7 (41.1)  |
|                                |                      |           | 50 mcg/h  | 4 (23.5)  |
|                                |                      |           | 100 mcg/h | 1 (5.9)   |
|                                |                      |           | 125 mcg/h | 2 (11.8)  |
|                                |                      |           | 150 mcg/h | 3 (17.7)  |
|                                | <b>Methadone</b>     | 2 (4.9)   | 2.5 mg    | 1 (50.0)  |
|                                |                      |           | 5.0 mg    | 1 (50.0)  |
| <b>Adjuvant<br/>analgesics</b> | <b>Pregabalin</b>    | 3 (7.3)   | 75 mg     | 2 (66.7)  |
|                                |                      |           | 300 mg    | 1 (33.3)  |
|                                | <b>Gabapentin</b>    | 3 (7.3)   | 300 mg    | 2 (66.7)  |
|                                |                      |           | 900 mg    | 1(33.3)   |
|                                | <b>Dexamethasone</b> | 16 (39.0) | 4 mg      | 4 (25.0)  |
|                                |                      |           | 8 mg      | 12 (75.0) |

---

\*TDD – total daily dosage
